# Supplementary material for: Rapid evolution of the PB1-F2 virulence protein expressed by human seasonal H3N2 influenza viruses reduces inflammatory responses to infection
Source: Springer Nature journal article supplement (doi:10.1186/s12985-017-0827-0), 2017-08-22

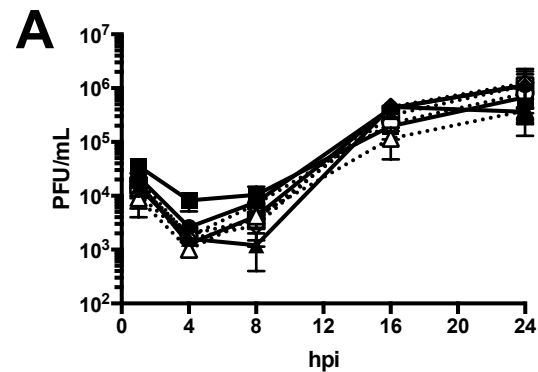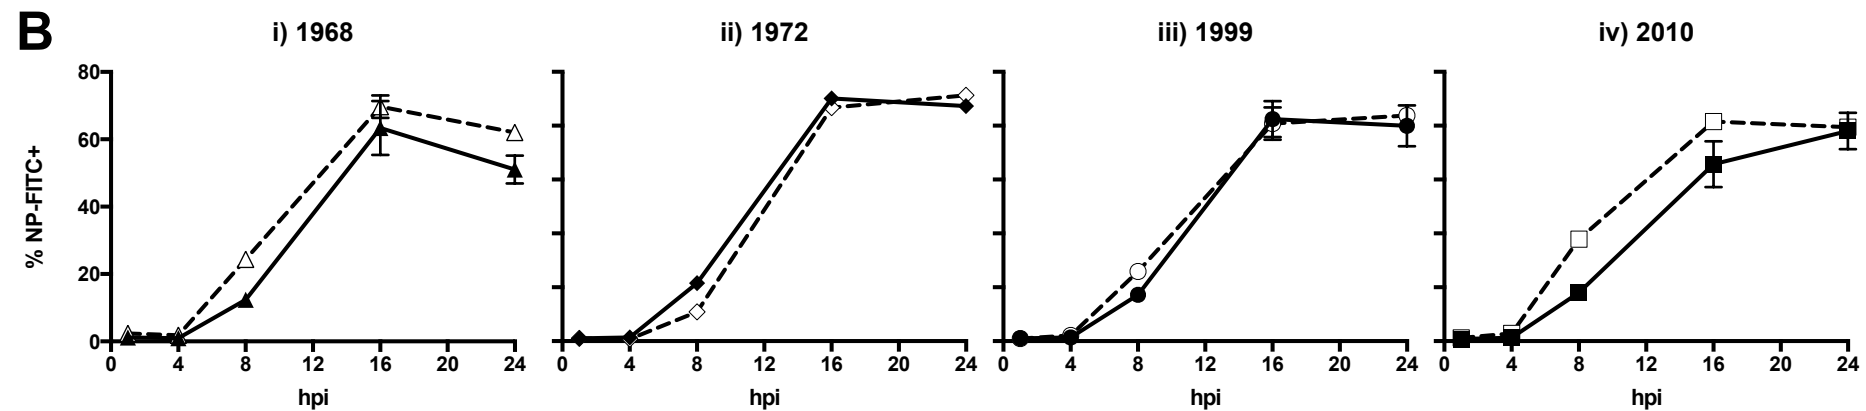

Supplement: MOESM2 [file 14233228]
